# Supplementary material
Source: PubMed Central journal article supplement (PMC10686190)
Supplement: NIHMS1943914-supplement-1.pdf [file NIHMS1943914-supplement-1.pdf]

**Supplemental Table 1:** The compositions (n=36) of unique recombinant forms (URFs)

observed among sequences collected in San Francisco from 2000 to 2016, and the number of San Francisco HIV/AIDS registry cases with sequences of each composition.

| Observed URF Composition <sup>a</sup>       | Number (%) of Registry Cases |
|---------------------------------------------|------------------------------|
| B, C                                        | 10 (0.1)                     |
| A1, B                                       | 9 (0.1)                      |
| CRF10_CD, B                                 | 6 (0.1)                      |
| B, CRF29_BF                                 | 5 (0.1)                      |
| B, F1                                       | 5 (0.1)                      |
| B, CRF15_01B, CRF01_AE, CRF02_AG            | 4 (0.1)                      |
| B, CRF01_AE, G                              | <4 (<0.1)                    |
| B, CRF02_AG                                 | <4 (<0.1)                    |
| B, G                                        | <4 (<0.1)                    |
| D, B                                        | <4 (<0.1)                    |
| D, B, C                                     | <4 (<0.1)                    |
| CRF18_cpx, B                                | <4 (<0.1)                    |
| CRF26_AU, B, F1                             | <4 (<0.1)                    |
| A1, CRF34_01B, CRF01_AE, CRF07_BC           | <4 (<0.1)                    |
| A1, B, CRF15_01B, CRF01_AE, CRF02_AG        | <4 (<0.1)                    |
| B, CRF04_cpx                                | <4 (<0.1)                    |
| B, CRF04_cpx, CRF09_cpx, CRF45_cpx          | <4 (<0.1)                    |
| B, CRF07_BC                                 | <4 (<0.1)                    |
| B, CRF15_01B, CRF34_01B, CRF01_AE, CRF02_AG | <4 (<0.1)                    |
| B, CRF25_cpx, G                             | <4 (<0.1)                    |
| B, CRF45_cpx                                | <4 (<0.1)                    |
| B, CRF49_cpx                                | <4 (<0.1)                    |
| B, C, CRF39_BF                              | <4 (<0.1)                    |
| D, C                                        | <4 (<0.1)                    |
| F2, F1                                      | <4 (<0.1)                    |
| H, B, CRF09_cpx, CRF02_AG                   | <4 (<0.1)                    |
| H, B, C, CRF31_BC, CRF06_cpx, CRF08_BC      | <4 (<0.1)                    |
| CRF01_AE, B, CRF28_BF                       | <4 (<0.1)                    |
| CRF06_cpx, B, CRF02_AG                      | <4 (<0.1)                    |
| CRF11_cpx, B                                | <4 (<0.1)                    |
| CRF20_BG, B                                 | <4 (<0.1)                    |

|                               |                  |
|-------------------------------|------------------|
| CRF31_BC, CRF34_01B, CRF44_BF | <4 (<0.1)        |
| CRF31_BC, B, C                | <4 (<0.1)        |
| B, CRF15_01B, CRF01_AE        | no matched cases |
| B, CRF28_BF, C                | no matched cases |
| CRF03_AB, B, C                | no matched cases |

<sup>a</sup> Compositions are not equivalent to specific recombinant forms. Recombinant sequences with the same composition may contain different portions and quantities of each component subtype/CRF.
